# Supplementary material
Source: Springer Nature journal article supplement (https://www.springermedizin.de/resource/supplementary/12889_2012_5005_MOESM1_ESM.pdf/9496280)

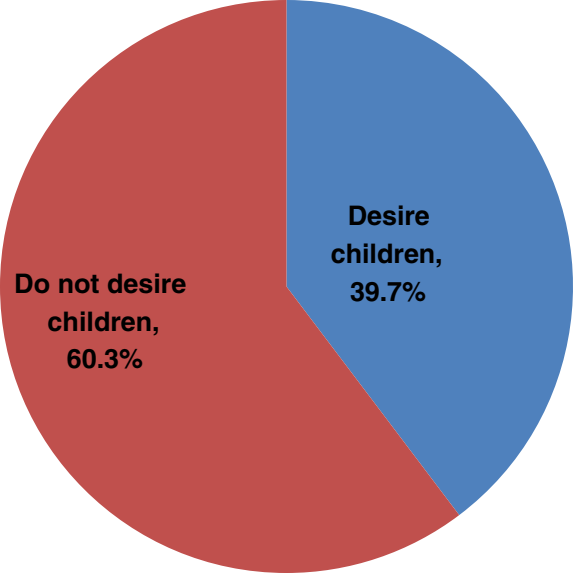

**Do not desire  
children,  
60.3%**

**Desire  
children,  
39.7%**

Supplement: MOESM1 [file 9496280]
